# Supplementary material for: Pharmacological Properties and Safe Use of 12 Medicinal Plant Species and Their Bioactive Compounds Affecting the Immune System
Source: MDPI journal article supplement (doi:10.3390/app13116477), 2023-05-25
Supplement: s1 [file s1]

**Table S1.** Chemical structure of main active constituents in herbs with immunostimulating effect.

| Source                                 | Type of extract           | Active molecule            | Structure                                                                                                                                                                                                                                              | Functions                                                                                                                               | Ref.     |
|----------------------------------------|---------------------------|----------------------------|--------------------------------------------------------------------------------------------------------------------------------------------------------------------------------------------------------------------------------------------------------|-----------------------------------------------------------------------------------------------------------------------------------------|----------|
| <i>Echinacea purpurea herba recens</i> | Fresh juice               | Alkamide complex           | $R-C(=O)-NH-CH_2-\underset{\text{CH}_3}{\overset{\text{CH}_3}{CH}}$ $R = \begin{array}{c} \text{---CH=CH---CH=CH---CH}_2\text{---CH=CH---CH=CH} \\ \text{---HC=HC---C=HC---H}_2\text{C---H}_2\text{C---C}\equiv\text{C---C}\equiv\text{C} \end{array}$ | <p>Stimulation of T lymphocytes</p> <p>Increase of globulin level</p> <p>Stimulation of leukocytosis and granulocytosis</p>             | [26, 27] |
| <i>Echinacea purpurea radix</i>        | Ethanolic extract         | Cichoric acid              | 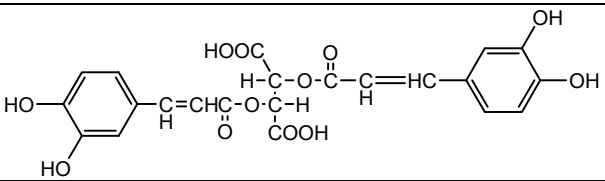                                                                                                                                                                     | Stimulation of interleukins (IL-1, IL-6) and TNF-α biosynthesis                                                                         | [28]     |
| <i>Echinacea pallida radix</i>         | Ethanolic extract         | Echinacoside               |                                                                                                                                                                     | <p>Increase of phagocytosis</p> <p>Stimulation of interferon and immunoglobulin biosynthesis</p> <p>Increase of cytokines</p>           | [29]     |
| <i>Echinacea angustifolia radix</i>    | Ethanolic extract         | Cynarin                    |                                                                                                                                                                    | <p>Stimulation of monocytes</p> <p>Increased production of TNF-α and interleukins (IL-10 and IL-12)</p> <p>Increase of phagocytosis</p> | [30, 31] |
| <i>Withania radix</i>                  | Aqueous extract           | Withaferin A               |                                                                                                                                                                    | <p>Th1 (IFN-γ, IL-2) and Th2 (IL-4) cytokine modulation</p> <p>Decrease in the concentration of T lymphocytes</p>                       | [32]     |
| <i>Eleutherococcus radix</i>           | Aqueous-ethanolic extract | Syringin = Eleutheroside B |                                                                                                                                                                     | <p>Increased phagocytosis of human leukocytes and granulocytes</p> <p>Increased level of interleukins (IL-1 and IL-6)</p>               | [33, 34] |

|                                            |                 |                               |                                                                                    |                                                                                                                                                                 |          |
|--------------------------------------------|-----------------|-------------------------------|------------------------------------------------------------------------------------|-----------------------------------------------------------------------------------------------------------------------------------------------------------------|----------|
| <i>Uncariae cortex</i>                     | Aqueous extract | Isopteropodine                | 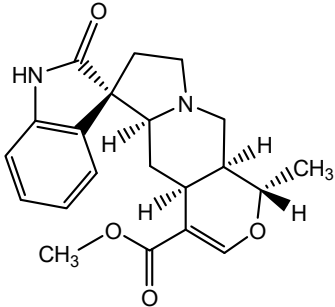  | <p>Stimulating of phagocytes</p> <p>Inhibition of cancer cell growth via the stimulation of interleukins (IL-1 and IL-6) production in alveolar macrophages</p> | [35, 36] |
| <i>Filipendulae ulmariae flos et herba</i> | Aqueous extract | Spiraeoside                   |   | <p>Increased anti-inflammatory activity via leukocyte stimulation</p>                                                                                           | [37]     |
| <i>Sambuci fructus</i>                     | Aqueous extract | Cyanidin 3-glucoside chloride |  | <p>Increased production of cytokines by monocytes</p>                                                                                                           | [38]     |
