# Supplementary material for: Pharmacological Properties and Safe Use of 12 Medicinal Plant Species and Their Bioactive Compounds Affecting the Immune System
Source: MDPI journal article supplement (doi:10.3390/app13116477), 2023-05-25
Supplement: s1 [file s1]

Archive with 1 entries (1 files):
- applsci-2383878-supplementary.pdf
